# Supplementary material for: Paleofluid flow:&nbsp;answers in the quartz.
Source: Research Square preprint supplement (doi:10.21203/rs.3.rs-403809/v1), 2021-04-12
Supplement: Supplementary file 1 [file fdd4f2c3ee6cc01a6a8c7aab.docx]

Supplementary material:

**NUMERICAL MODELING:**

The aim of our model is, for various velocities, to compute the ratio of the chemical flux feeding equivalent crystal faces to the growth band thickness ratio. Then, by using the inverse method, we will be able to estimate the velocity flowing in the vein. This approach is primarily based on the idea that the chemical flux is dependent on the boundary layer thickness of volume diffusion 10,12. This parameter depends on flow velocity and grain shape. Since quartz crystals within the vein have various shapes and growth modes, we investigate the influence of geometrical parameters driving the growth band layer: the size of the crystal, the flow’s incidence angle with the grain, the various crystal face sizes and the crystal growth mode (trigonal pyramid or basal prismatic growth).

All the numerical simulations are conducted to solve the Navier Stockes and chemical transport equations at 200 °C and 300 °C, i.e.,  within the range of the temperature measured in the Limagne area waters17 and 500 bars (lithostatic pressure in the Limagne Basin). The size of the box is large compared to the grain size. Along the crystal faces the boundary condition for concentration is 0, i.e., saturation in dimensionless concentration, and 1 for the supersaturated fluid entering the model (Supplementary data 1) 10. Basal prismatic growth (m faces) was modeled in 2D, and for each size range from 10 µm to 4000 µm, five quartz grain geometries were selected in order to test the effect of face size and incidence angle. We considered two limit situations i) with a face perpendicular to the flow and ii) with an angle of 30° (Supplementary data 2).  Growth on the r and z faces of the trigonal pyramid is simulated by a 3D model to test the influence of the size and the angle of incidence with crystal faces, again with two limit cases (Supplementary data 1,2). For each simulation the equivalent faces corresponding to the upstream ratio, i.e., the a-c-e ratio and the downstream ratio (b-d-f ratio) are calculated (Supplementary data 2).

Figure Caption

Supplementary Data 1: Geometry and initial parameters for the numerical modeling.

Supplementary Data 2: Results of all numerical simulations of this study.
